# Supplementary material
Source: PubMed Central journal article supplement (PMC7869834)

## 1 **Supplemental Materials and Methods**

### 2 **1. MicroCT Analysis of Trabecular Architecture**

3 To evaluate trabecular architecture of the distal femur, microCT was performed on fixed  
4 bones, as described previously using a Scanco  $\mu$ CT scanner and a 21- $\mu$ m voxel size (26, 32, 40,  
5 41). The femur was placed in a holder and scanned non-destructively by using a Scanco  $\mu$ CT  
6 scanner (vivaCT 80; Scanco Medical AG, Bassersdorf, Switzerland) at 21  $\mu$ m isotropic voxel size  
7 (the highest resolution) with X-ray source power of 55 kV and 145  $\mu$ A and integration time of 300  
8 milliseconds. The trabecular microstructure of the distal femur was evaluated. The scanned grey-  
9 scale images were processed by using a low-pass Gaussian filter ( $\sigma = 0.8$ , support = 1) to  
10 remove noise, and a fixed threshold of 220 was used to extract the mineralized bone from soft  
11 tissue and marrow phase. The reconstruction and 3D quantitative analyses were performed by  
12 using software provided by Scanco. The same settings for scan and analysis were used for all  
13 samples.

14 Scans were initiated at the distal end of the femur and extended to the center of the femur,  
15 for a total of approximately 777 slices (~16.3 mm). Trabecular regions of interest consisted of 189  
16 slices (~3.969 mm), beginning 0.5 mm proximal to the growth plate and continuing in a proximal  
17 direction, were included in the bone analysis. Cortical regions of interest consisted of 100 slices  
18 at the proximal end of the scans, located ~2.1 mm at the center of the femur, were also analyzed.  
19 Cancellous bone was separated from the cortical regions by semi-automatically drawn contours.  
20 The following 3D indices in the defined ROI were analyzed: bone volume (BV,  $\text{mm}^3$ ), tissue  
21 (cortical and marrow) volume (TV,  $\text{mm}^3$ ), relative bone volume over total volume (BV/TV, %),  
22 trabecular number (Tb.N,  $\text{mm}^{-1}$ ), trabecular thickness (Tb.Th,  $\mu\text{m}$ ), trabecular separation (Tb.Sp,  
23  $\mu\text{m}$ ), connectivity density (Conn.Dn,  $\text{mm}^{-3}$ ), structure model index (SMI, ranges from 0 to 3 with 0  
24 = platelike and 3 = rodlike).

25

26 2. Quantitative PCR.

27 The following osteoblastic and osteoclastic primers are purchased from ABI TaqMan Gene  
28 Expression Assay: RANKL (Rn00589289\_m1), TRAP (Rn00569608\_m1), Intergrin  $\beta$ 3  
29 (Rn01763790\_m1), calcitonin receptor (CTR) (Rn00587525\_m1), Runx2 (Rn01512296\_m1),  
30 osteocalcin (Rn00566386\_g1), BSP (Rn00561414\_m1), DKK1 (Rn01501538\_g1), DKK2 (Rn0  
31 1748499\_m1), and sFRP1 (Rn01478472\_m1). SOST primer is a customer-made one: SOST-  
32 R: ATCTTTGGCGTCATAGGGATGGTG; SOST-F:CTTCAGGAATGATGCCACAGAGGT.

33

34 **Supplemental Figure Legend**

35 **Figure 1. Cortical architecture of the femur midshaft after acute SCI. (A)** Representative  
36 micro-CT 3D-images of cortical microarchitecture are displayed. **(B)** Cortical bone area (Ct.Ar),  
37 total tissue area (Tt.Ar), the ratio of Ct.Ar and Tt.Ar (Ct.Ar/Tt.Ar), Cortical bone thickness (Ct.Th)  
38 and medullary area. The percent change versus Sham group was calculated at 2- and 7-days  
39 post-SCI for each outcome measurement and then was plotted in the graph. Data are expressed  
40 as mean  $\pm$  SEM  $n = 6-7$  animals per group. Significance of differences was determined by using  
41 Student's *t*-test. \*  $< 0.05$  versus the indicated group.

**Supplemental Table 1. The summarized data expressed in the original units of measurement by micro-CT**

|            | 2 days           |                 |                    |                   |               |                |                |
|------------|------------------|-----------------|--------------------|-------------------|---------------|----------------|----------------|
|            | BV/TV            | Tb.N            | Tb.Th              | Tb.Sp             | Conn-Dens.    | SMI            | Stiffness      |
| Sham (n=7) | 0.2646 ± 0.02668 | 3.863 ± 0.05561 | 0.0684 ± 0.006116  | 0.1906 ± 0.009115 | 96.29 ± 6.754 | 1.324 ± 0.2957 | 2023 ± 264.2   |
| SCI (n=6)  | 0.2156 ± 0.01937 | 3.333 ± 0.1104  | 0.06242 ± 0.004569 | 0.2010 ± 0.01180  | 76.46 ± 4.982 | 1.674 ± 0.2030 | 1230 ± 237.0   |
|            | 7 days           |                 |                    |                   |               |                |                |
|            | BV/TV            | Tb.N            | Tb.Th              | Tb.Sp             | Conn-Dens.    | SMI            | Stiffness      |
| Sham (n=7) | 0.2342 ± 0.01072 | 4.121 ± 0.2125  | 0.07398 ± 0.001806 | 0.2517 ± 0.01583  | 122.0 ± 7.797 | 1.708 ± 0.1011 | 2.208 ± 0.3343 |
| SCI (n=6)  | 0.1668 ± 0.01936 | 3.468 ± 0.1941  | 0.06558 ± 0.002492 | 0.3127 ± 0.01663  | 68.69 ± 13.44 | 2.325 ± 0.2131 | 1.043 ± 0.3410 |

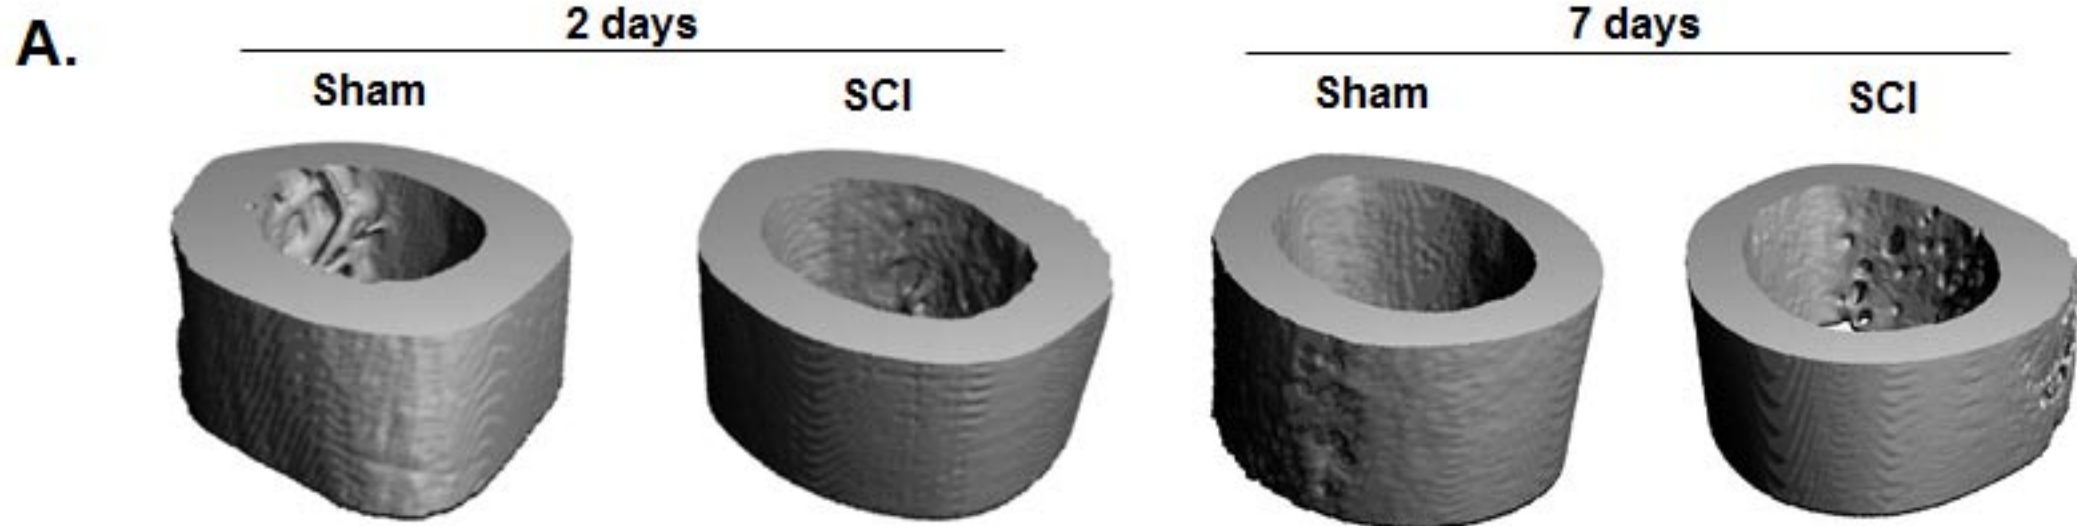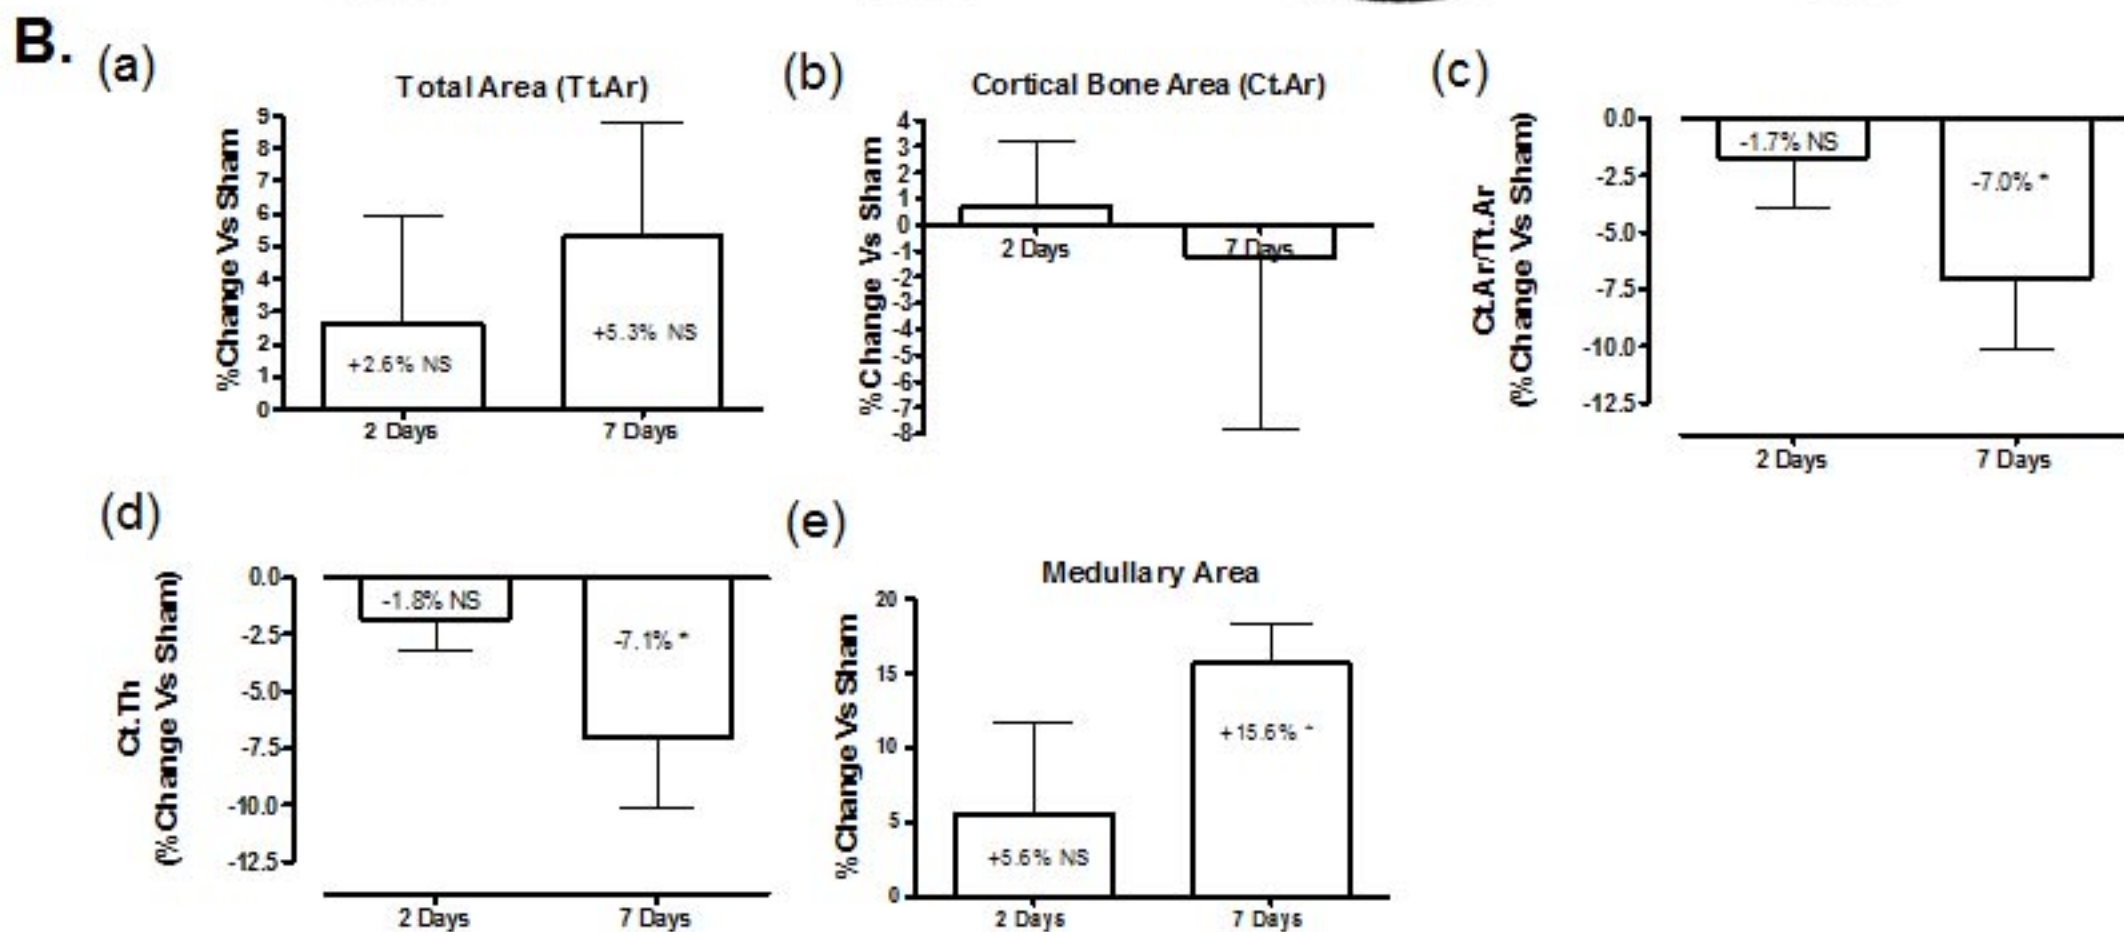

Supplement: NIHMS1661049-supplement-Supplemental_Material.pdf [file NIHMS1661049-supplement-Supplemental_Material.pdf]
